# Supplementary material for: Optical coherence tomography for serial in vivo imaging of aortic plaque in the rabbit: a preliminary experience
Source: HighWire-hosted journal article supplement (doi:10.1136/openhrt-2015-000314), 2015-10-01

### Supplementary Figures:

Supplementary Figure 1. Indexed plaque volume ( $\pm$  SEM) over time in balloon injured ( $\pm$  statin therapy) compared to non balloon-injured rabbits on a high cholesterol diet

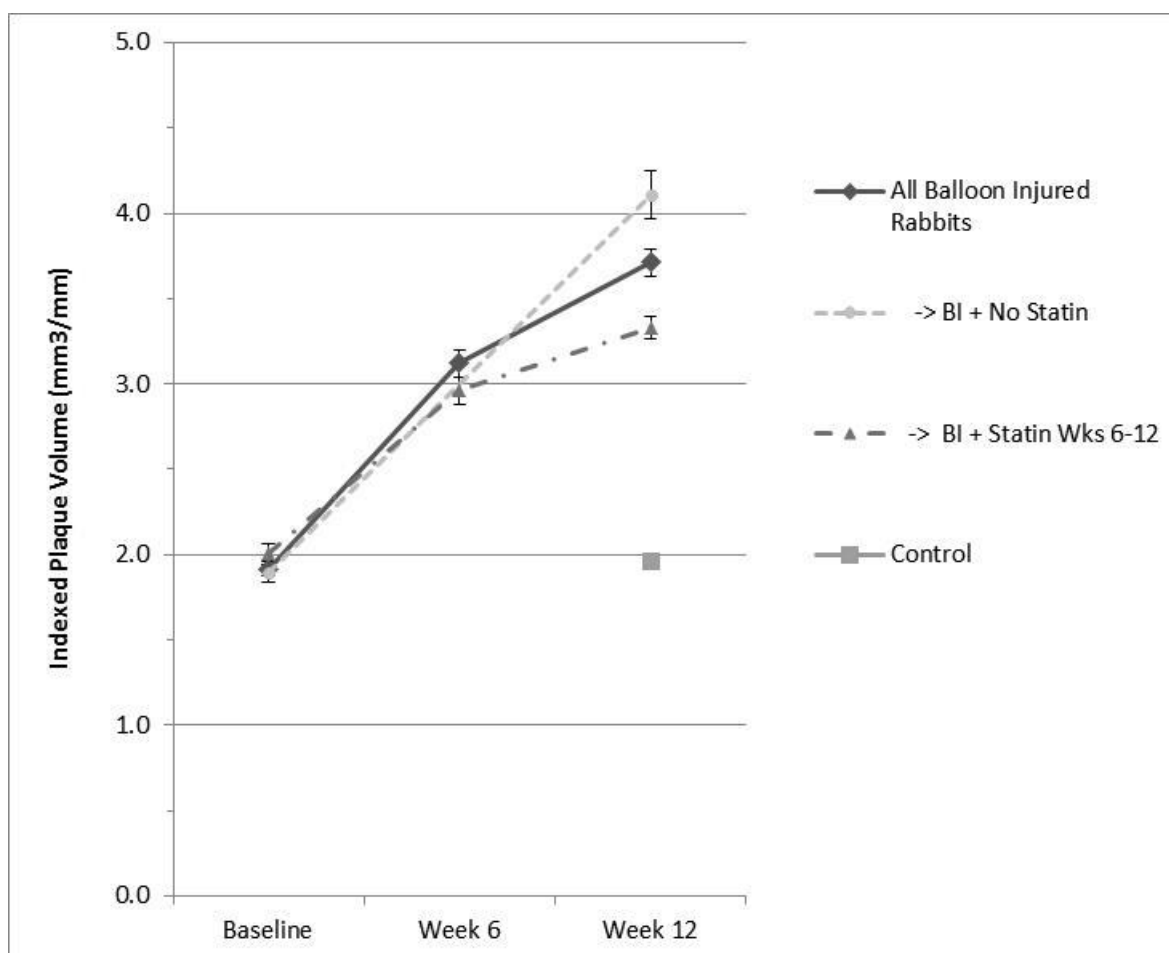

Supplementary Figure 2. Comparison of aortic plaque formed by high cholesterol diet alone (A, C) or by high cholesterol diet and balloon injury (B, D)

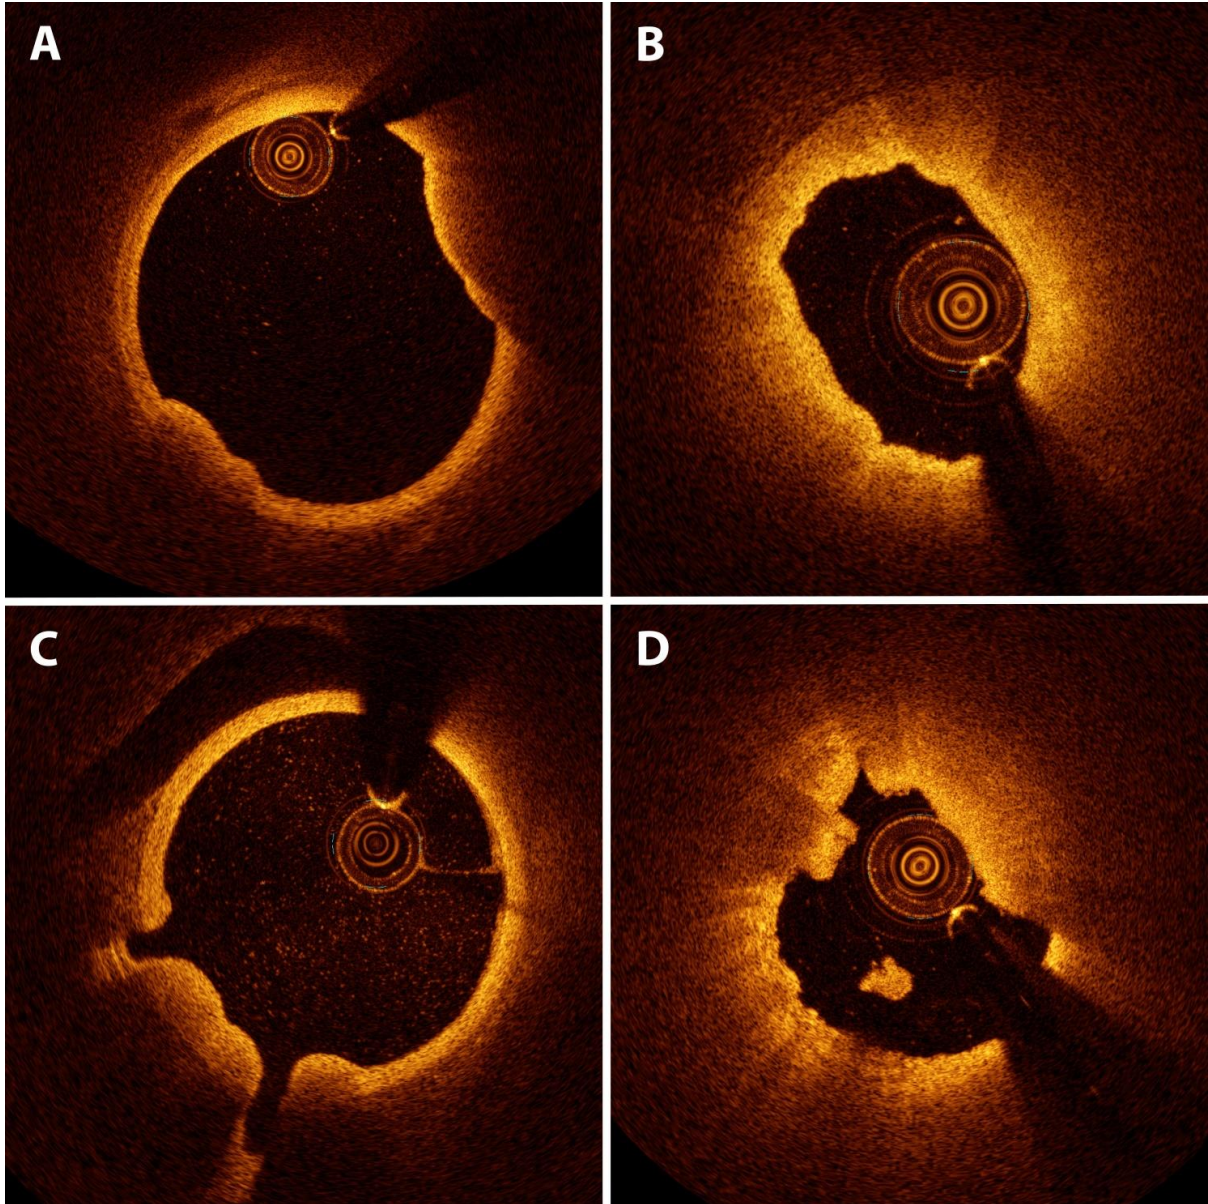

Supplement: openhrt-2015-000314supp_figures.pdf [file openhrt-2015-000314supp_figures.pdf]
